# Supplementary material
Source: PubMed Central journal article supplement (PMC3472555)
Supplement: Supp_Fig1.pdf [file Supp_Fig1.pdf]

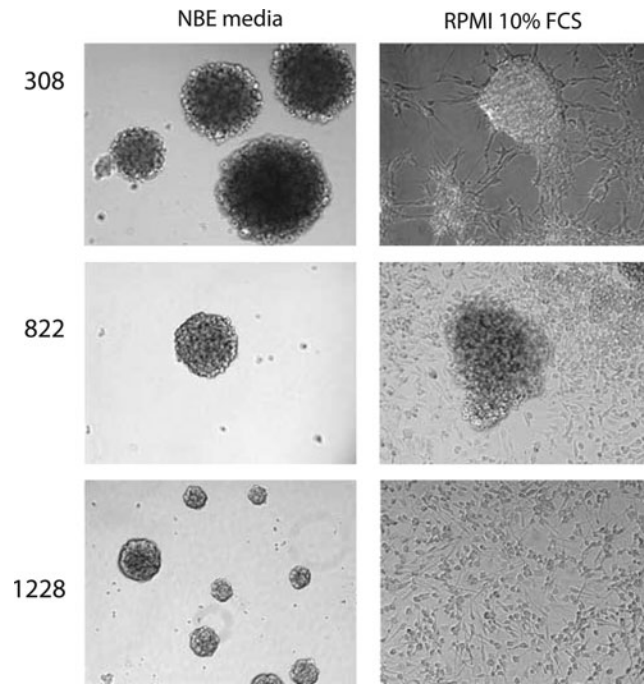

**SUPPLEMENTARY FIG. S1.** Photomicrographs of GSC lines used in these studies. On the left, cells were grown in Neurobasal medium supplemented with bFGF and EGF (NBE) or in RPMI 1640 supplemented with 10% fetal calf serum (FCS) for 3 days. Phase-contrast images are shown (magnification, 40 $\times$ ).
